# Supplementary material
Source: publisher site journal article supplement (https://www.spandidos-publications.com/253/downloadSupplementary)

Figure S1. PHI modulates the Bax/Bcl-2 ratio in Kasumi-1 cells. Kasumi-1 cells were treated with either PHI (5, 10, 20 and 40  $\mu\text{mol/l}$ ) or DMSO (control) for 24 h. Bcl-2 and Bax proteins were detected by western blotting. The bar diagram summarizes the effects of PHI treatment on the Bax/Bcl-2 ratio. The data show that PHI upregulated the ratio of Bax/Bcl-2. Significant differences were observed between the treatment groups and the control (\* $P<0.05$  and \*\* $P<0.01$ ). PHI, phenyl-hexyl isothiocyanate; DMSO, dimethyl sulfoxide.

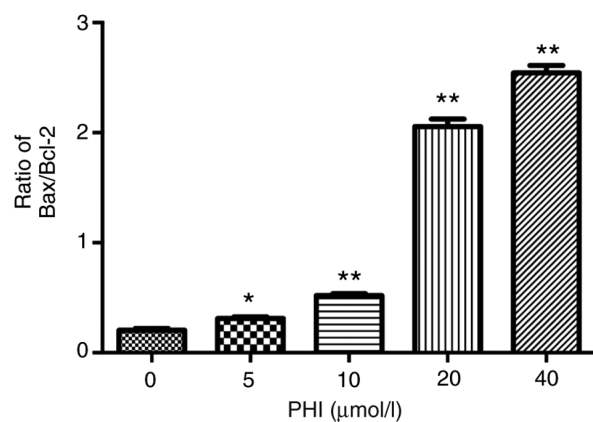

Supplement: Supplementary file 1 [file downloadSupplementary]
